# Supplementary material for: Diagnostic Accuracy of the InBios Scrub Typhus Detect Enzyme-Linked Immunoassay for the Detection of IgM Antibodies in Northern Thailand
Source: PubMed Central journal article supplement (PMC4744921; doi:10.1128/cvi.00553-15), 2016-02-05
Supplement: CVI.00553-15_zcd999095304so1.pdf [file CVI.00553-15_zcd999095304so1.pdf]

**Supplementary Table S1.** Diagnostic accuracy of the InBios Scrub Typhus Detect™ ELISA for the detection of IgM antibodies.

| Sample IFA titer                 | IgM 1:100               |                 | IgM 1:200               |      | IgM 1:400               |      | IgM 1:800               |      | IgM 1:1,600             |      | IgM 1:3,200              |      | IgM 1:6,400             |      | IgM 1:12,800            |      | IgM 1:25,600            |      |
|----------------------------------|-------------------------|-----------------|-------------------------|------|-------------------------|------|-------------------------|------|-------------------------|------|--------------------------|------|-------------------------|------|-------------------------|------|-------------------------|------|
| ELISA Cut-off <sup>a</sup>       | Sn <sup>b</sup>         | Sp <sup>c</sup> | Sn                      | Sp   | Sn                      | Sp   | Sn                      | Sp   | Sn                      | Sp   | Sn                       | Sp   | Sn                      | Sp   | Sn                      | Sp   | Sn                      | Sp   |
| ≥0.10 (0.1002)                   | 92.0                    | 44.1            | 90.7                    | 35.7 | 92.1                    | 32.5 | 90.3                    | 30.6 | 92.6                    | 30.4 | 92.3                     | 30.1 | 95.0                    | 29.6 | 94.7                    | 29.3 | 92.9                    | 28.3 |
| ≥0.15 (0.1531)                   | 77.3                    | 72.7            | 81.5                    | 64.3 | 86.8                    | 59.7 | 87.1                    | 57.0 | 92.6                    | 56.8 | 92.3                     | 56.4 | 95.0                    | 54.6 | 94.7                    | 54.1 | 92.9                    | 52.2 |
| ≥0.20 (0.2011)                   | 66.7                    | 89.6            | 75.9                    | 82.7 | 86.8                    | 78.1 | 87.1                    | 74.4 | 92.6                    | 73.6 | 92.3                     | 73.0 | 95.0                    | 70.5 | 94.7                    | 69.9 | 92.9                    | 67.4 |
| ≥0.25 (0.2541)                   | 61.3                    | 94.8            | 74.1                    | 89.8 | 86.8                    | 85.1 | 87.1                    | 81.0 | 92.6                    | 80.0 | 92.3                     | 79.4 | 95.0                    | 76.5 | 94.7                    | 75.9 | 92.9                    | 73.9 |
| ≥0.30 (0.3051)                   | 54.7                    | 97.1            | 70.4                    | 94.9 | 84.2                    | 90.4 | 87.1                    | 86.8 | 92.6                    | 85.6 | 92.3                     | 84.9 | 95.0                    | 81.8 | 94.7                    | 81.2 | 92.9                    | 78.3 |
| ≥0.35 (0.4477)                   | 48.0                    | 98.7            | 63.0                    | 97.0 | 84.2                    | 95.6 | 87.1                    | 91.7 | 92.6                    | 90.4 | 92.3                     | 89.7 | 95.0                    | 86.3 | 94.7                    | 85.7 | 92.9                    | 82.6 |
| ≥0.40 (0.4477)                   | 48.0                    | 98.7            | 63.0                    | 97.0 | 84.2                    | 95.6 | 87.1                    | 91.7 | 92.6                    | 90.4 | 92.3                     | 89.7 | 95.0                    | 86.3 | 94.7                    | 85.7 | 92.9                    | 82.6 |
| ≥0.45 (0.5279)                   | 46.7                    | 98.7            | 63.0                    | 98.0 | 84.2                    | 96.5 | 87.1                    | 92.6 | 92.6                    | 91.2 | 92.3                     | 90.5 | 95.0                    | 87.1 | 94.7                    | 86.5 | 92.9                    | 83.3 |
| ≥0.50 (0.5279)                   | 46.7                    | 98.7            | 63.0                    | 98.0 | 84.2                    | 96.5 | 87.1                    | 92.6 | 92.6                    | 91.2 | 92.3                     | 90.5 | 95.0                    | 87.1 | 94.7                    | 86.6 | 92.9                    | 83.3 |
| ≥0.55 (0.5916)                   | 45.3                    | 98.7            | 61.1                    | 98.0 | 84.2                    | 97.4 | 87.1                    | 93.4 | 92.6                    | 92.0 | 92.3                     | 91.3 | 95.0                    | 87.9 | 94.7                    | 87.2 | 92.9                    | 84.1 |
| ≥0.60 (0.6221)                   | 45.3                    | 100             | 61.1                    | 99.0 | 84.2                    | 98.3 | 87.1                    | 94.2 | 92.6                    | 92.8 | 92.3                     | 92.1 | 95.0                    | 88.6 | 94.7                    | 88.0 | 92.9                    | 84.8 |
| ≥0.65 (0.6984)                   | 44.0                    | 100             | 59.2                    | 99.0 | 81.6                    | 98.3 | 87.1                    | 95.0 | 92.6                    | 93.6 | 92.3                     | 92.9 | 95.0                    | 90.2 | 94.7                    | 88.7 | 92.9                    | 85.5 |
| ≥0.70 (0.7466)                   | 41.3                    | 100             | 55.6                    | 99.0 | 79.0                    | 99.1 | 83.9                    | 95.9 | 88.9                    | 94.4 | 92.3                     | 94.4 | 95.0                    | 90.1 | 94.7                    | 90.3 | 92.9                    | 87.0 |
| ≥0.75 (0.7843)                   | 38.7                    | 100             | 51.9                    | 99.0 | 73.7                    | 99.1 | 83.9                    | 97.5 | 88.9                    | 96.0 | 92.3                     | 96.0 | 95.0                    | 92.4 | 94.7                    | 91.3 | 92.9                    | 88.4 |
| ≥0.80 (0.8662)                   | 37.3                    | 100             | 50.0                    | 99.0 | 71.1                    | 99.1 | 83.9                    | 98.4 | 88.9                    | 96.8 | 92.3                     | 96.8 | 95.0                    | 92.2 | 94.7                    | 92.5 | 92.9                    | 89.1 |
| ≥0.85 (0.8662)                   | 37.3                    | 100             | 50.0                    | 99.0 | 71.1                    | 99.1 | 83.9                    | 98.4 | 88.9                    | 96.8 | 92.3                     | 96.8 | 95.0                    | 92.2 | 94.7                    | 92.5 | 92.9                    | 89.1 |
| ≥0.90 (0.9650)                   | 36.0                    | 100             | 48.2                    | 99.0 | 68.4                    | 99.1 | 77.4                    | 98.4 | 85.2                    | 96.0 | 88.5                     | 96.8 | 95.0                    | 94.7 | 94.7                    | 93.2 | 92.9                    | 89.9 |
| ≥0.95 (0.9650)                   | 36.0                    | 100             | 48.2                    | 99.0 | 68.4                    | 99.1 | 77.4                    | 98.4 | 85.2                    | 96.0 | 88.5                     | 96.8 | 95.0                    | 97.4 | 94.7                    | 93.2 | 92.9                    | 89.9 |
| ≥1.00 (1.104)                    | 33.3                    | 100             | 44.4                    | 99.0 | 63.2                    | 99.1 | 74.2                    | 98.4 | 85.2                    | 98.4 | 88.5                     | 98.4 | 95.0                    | 95.5 | 94.7                    | 94.7 | 92.9                    | 91.3 |
| ≥1.50 (1.709)                    | 30.7                    | 100             | 40.7                    | 99.0 | 57.9                    | 99.1 | 71.0                    | 99.2 | 81.5                    | 98.4 | 84.6                     | 98.4 | 90.0                    | 96.2 | 89.5                    | 95.6 | 85.7                    | 92.0 |
| ≥2.00 (3.049)                    | 26.7                    | 100             | 35.2                    | 99.0 | 50.0                    | 99.1 | 61.3                    | 99.2 | 70.4                    | 99.2 | 73.1                     | 98.4 | 90.0                    | 98.5 | 89.5                    | 97.7 | 85.7                    | 94.2 |
| ≥2.50 (3.049)                    | 26.7                    | 100             | 35.2                    | 99.0 | 50.0                    | 99.1 | 61.3                    | 99.2 | 70.4                    | 99.2 | 73.1                     | 98.4 | 90.0                    | 98.5 | 89.5                    | 97.7 | 85.7                    | 94.2 |
| ≥3.00 (3.049)                    | 26.7                    | 100             | 35.2                    | 99.0 | 50.0                    | 99.1 | 61.3                    | 99.2 | 70.4                    | 99.2 | 73.1                     | 98.4 | 90.0                    | 98.5 | 89.5                    | 97.7 | 85.7                    | 94.2 |
| ≥3.50 (3.753)                    | 25.3                    | 100             | 33.3                    | 99.0 | 47.4                    | 99.1 | 58.1                    | 99.2 | 66.7                    | 99.2 | 69.2                     | 98.4 | 90.0                    | 99.2 | 89.5                    | 98.5 | 85.7                    | 94.9 |
| ≥4.00 (4.149)                    | 22.7                    | 100             | 29.6                    | 99.0 | 42.1                    | 99.1 | 51.6                    | 99.2 | 59.2                    | 99.2 | 61.5                     | 98.4 | 90.0                    | 99.2 | 79.0                    | 98.5 | 71.4                    | 96.4 |
| ≥4.50 (4.544)                    | 9.3                     | 100             | 13.0                    | 100  | 18.4                    | 100  | 22.6                    | 100  | 25.9                    | 100  | 26.9                     | 100  | 35.0                    | 100  | 31.6                    | 99.3 | 28.6                    | 97.8 |
| ≥5.00 (5.172)                    | 1.3                     | 100             | 1.9                     | 100  | 2.6                     | 100  | 3.2                     | 100  | 3.7                     | 100  | 3.9                      | 100  | 5.0                     | 100  | 5.3                     | 100  | 7.1                     | 100  |
| <b>AUROC<sup>d</sup> (95%CI)</b> | <b>0.85 (0.79-0.91)</b> |                 | <b>0.85 (0.78-0.92)</b> |      | <b>0.89 (0.81-0.98)</b> |      | <b>0.89 (0.79-0.99)</b> |      | <b>0.93 (0.84-1.00)</b> |      | <b>0.93 (0.83-0.100)</b> |      | <b>0.95 (0.85-1.00)</b> |      | <b>0.94 (0.84-1.00)</b> |      | <b>0.90 (0.77-1.00)</b> |      |

*Abbreviations:* <sup>a</sup> actual OD value for cut-off at which Sn and Sp was derived/ <sup>b</sup> sensitivity/<sup>a</sup> specificity/<sup>d</sup> Area under receiver operator characteristic curve. Data for Sn % and Sp % were derived from ROC analysis.
