# Supplementary material for: Diagnostic Accuracy of the InBios Scrub Typhus Detect Enzyme-Linked Immunoassay for the Detection of IgM Antibodies in Northern Thailand
Source: PubMed Central journal article supplement (PMC4744921; doi:10.1128/cvi.00553-15), 2016-02-05
Supplement: CVI.00553-15_zcd999095304so2.pdf [file CVI.00553-15_zcd999095304so2.pdf]

**Supplementary Table S2.** Sensitivity and specificity for the Inbios IgM ELISA for the detection of scrub typhus IgM antibodies compared to the STIC and other diagnostic modalities.

| Cut-off OD            | Sample timing | Pos/N eg | ELISA |                  | Sensitivity (95% CI) | Specificity (95% CI) | NPV (95% CI) <sup>c</sup> | PPV (95% CI) <sup>b</sup> | AUROCC (95% CI)  | p-value       |
|-----------------------|---------------|----------|-------|------------------|----------------------|----------------------|---------------------------|---------------------------|------------------|---------------|
|                       |               |          | +     | -                |                      |                      |                           |                           |                  |               |
| <b>0.1</b>            | STIC          | +        | 38    | 5                | 88.4 (74.9-96.1)     | 31.2 (22.7-40.8)     | 87.2 (72.6-               | 33.6 (25.0-               | 0.60 (0.53-0.66) | <b>0.008</b>  |
|                       |               | -        | 75    | 34               |                      |                      |                           |                           |                  |               |
|                       | IVI           | +        | 6     | 1                | 85.7 (42.1-99.6)     | 26.2 (19.3-34.2)     | 5.3 (2.0-11.2)            | 97.4 (86.5                | 0.56 (0.42-70)   | 0.678         |
|                       |               | -        | 107   | 38               |                      |                      |                           |                           |                  |               |
|                       | PCR           | +        | 22    | 2                | 91.1 (73.0-99.0)     | 28.9 (21.2-37.6)     | 94.9 (82.7-               | 19.5 (12.6-               | 0.60 (0.53-0.67) | <b>0.041</b>  |
|                       |               | -        | 91    | 37               |                      |                      |                           |                           |                  |               |
| IFA 4-fold rise       | +             | 19       | 3     | 86.4 (65.1-97.1) | 26.9 (18.8-36.2)     | 19.4 (12.1-          | 90.6 (75.0-               | 0.57 (0.48-0.65)          | 0.242            |               |
|                       | -             | 79       | 29    |                  |                      |                      |                           |                           |                  |               |
| IFA 4-fold rise + Adm | +             | 28       | 1     | 96.6 (82.2-99.9) | 30.9 (22.2-39.9)     | 24.8 (17.1-          | 97.4 (86.5-               | 0.64 (0.58-0.69)          | <b>0.002</b>     |               |
|                       | -             | 85       | 38    |                  |                      |                      |                           |                           |                  |               |
| <b>0.2</b>            | STIC          | +        | 28    | 15               | 65.1 (49.1-80.6)     | 72.5 (63.1-80.6)     | 84.0 (75.0-               | 48.3 (35.0-               | 0.69 (0.60-0.77) | <b>≤0.001</b> |
|                       |               | -        | 30    | 79               |                      |                      |                           |                           |                  |               |
|                       | IVI           | +        | 5     | 2                | 71.4 (29.0-96.3)     | 63.4 (55.1-71.3)     | 8.6 (2.9-19.0)            | 97.9 (92.5-               | 0.67 (0.49-0.86) | <b>0.106</b>  |
|                       |               | -        | 53    | 92               |                      |                      |                           |                           |                  |               |
|                       | PCR           | +        | 21    | 3                | 87.5 (67.6-97.3)     | 71.1 (62.4-78.8)     | 36.2 (24.0-               | 96.8 (91.0-               | 0.79 (0.71-0.87) | <b>≤0.001</b> |
|                       |               | -        | 37    | 91               |                      |                      |                           |                           |                  |               |
| IFA 4-fold rise       | +             | 10       | 12    | 45.5 (24.4-67.8) | 64.8 (55.0-73.8)     | 20.8 (10.5-          | 85.4 (75.8-               | 0.55 (0.44-0.66)          | 0.363            |               |
|                       | -             | 38       | 70    |                  |                      |                      |                           |                           |                  |               |
| IFA 4-fold rise + Adm | +             | 28       | 1     | 96.6 (82.2-99.9) | 75.6 (67.0-82.9)     | 48.3 (35.0-          | 98.9 (94.2-               | 0.86 (0.81-0.91)          | <b>≤0.001</b>    |               |
|                       | -             | 30       | 93    |                  |                      |                      |                           |                           |                  |               |
| <b>0.3</b>            | STIC          | +        | 26    | 17               | 60.5 (44.4-75.0)     | 84.4 (76.2-90.6)     | 60.5 (44.4-               | 84.4 (76.2-               | 0.72 (0.64-0.80) | <b>≤0.001</b> |
|                       |               | -        | 17    | 92               |                      |                      |                           |                           |                  |               |
|                       | IVI           | +        | 5     | 2                | 71.4(29.0-96.3)      | 73.8 (65.8-80.7)     | 11.6 (3.9-25.1)           | 98.2 (93.5-               | 0.73 (0.54-0.91) | <b>0.020</b>  |
|                       |               | -        | 38    | 107              |                      |                      |                           |                           |                  |               |
|                       | PCR           | +        | 20    | 4                | 83.3 (62.6-95.3)     | 82.0 (74.3-88.3)     | 46.5 (31.2-               | 96.3 (90.9-               | 0.82 (0.74-0.91) | <b>≤0.001</b> |
|                       |               | -        | 23    | 105              |                      |                      |                           |                           |                  |               |
| IFA 4-fold rise       | +             | 8        | 14    | 36.4 (17.2-59.3) | 74.1 (64.8-82.0)     | 22.2 (10.1-          | 85.1 (76.3-               | 0.55 (0.44-0.66)          | 0.319            |               |
|                       | -             | 28       | 80    |                  |                      |                      |                           |                           |                  |               |
| IFA 4-fold rise + Adm | +             | 20       | 1     | 96.6 (82.2-99.9) | 87.8 (80.7-93.0)     | 65.1 (49.1-          | 99.1 (95.0-               | 0.92 (0.88-0.97)          | <b>≤0.001</b>    |               |
|                       | -             | 15       | 108   |                  |                      |                      |                           |                           |                  |               |
| <b>0.4</b>            | STIC          | +        | 25    | 18               | 58.1 (42.1-73.0)     | 89.0 (81.6-94.2)     | 67.6 (50.2-               | 84.3 (76.4-               | 0.74 (0.66-0.82) | <b>≤0.001</b> |
|                       |               | -        | 12    | 97               |                      |                      |                           |                           |                  |               |
|                       | IVI           | +        | 5     | 2                | 71.4 (29.0-96.3)     | 77.9 (70.3-84.4)     | 13.5 (4.5-28.8)           | 98.3 (93.9-               | 0.75 (0.56-0.93) | <b>0.010</b>  |
|                       |               | -        | 32    | 113              |                      |                      |                           |                           |                  |               |
|                       | PCR           | +        | 20    | 4                | 83.3 (62.6-95.3)     | 86.7 (79.6-92.1)     | 54.1 (36.9-               | 96.5 (91.3-               | 0.85 (0.77-0.93) | <b>≤0.001</b> |
|                       |               | -        | 17    | 111              |                      |                      |                           |                           |                  |               |
| IFA 4-fold rise       | +             | 7        | 16    | 31.8 (13.9-54.9) | 77.8 (68.8-85.2)     | 22.6 (9.6-41.1)      | 84.8 (76.2-               | 0.55 (0.44-0.66)          | 0.336            |               |
|                       | -             | 24       | 84    |                  |                      |                      |                           |                           |                  |               |
| IFA 4-fold rise + Adm | +             | 28       | 1     | 96.6 (82.2-99.9) | 92.7 (86.6-96.6)     | 75.7 (58.8-          | 99.1 (95.3-               | 0.95 (0.91-0.99)          | <b>≤0.001</b>    |               |
|                       | -             | 9        | 114   |                  |                      |                      |                           |                           |                  |               |
| <b>0.5</b>            | STIC          | +        | 25    | 18               | 58.1 (42.1-73.0)     | 89.9 (82.7-94.9)     | 69.4 (51.9-               | 84.5 (76.6-               | 0.74 (0.66-0.82) | <b>≤0.001</b> |
|                       |               | -        | 11    | 98               |                      |                      |                           |                           |                  |               |
|                       | IVI           | +        | 5     | 2                | 71.4(29.0-96.3)      | 78.6 (71.0-85.0)     | 13.9 (4.7-29.5)           | 98.3 (93.9-               | 0.75 (0.56-0.93) | <b>0.009</b>  |
|                       |               | -        | 31    | 114              |                      |                      |                           |                           |                  |               |
|                       | PCR           | +        | 20    | 4                | 83.3 (62.6-95.3)     | 87.5 (80.5-92.7)     | 55.6 (38.1-               | 96.6 (91.4-               | 0.85 (0.77-0.94) | <b>≤0.001</b> |
|                       |               | -        | 16    | 112              |                      |                      |                           |                           |                  |               |
| IFA 4-fold rise       | +             | 7        | 15    | 31.8 (13.9-54.9) | 78.7 (69.8-86.0)     | 23.3 (9.9-42.3)      | 85.0 (76.5-               | 0.55 (0.44-0.65)          | 0.286            |               |
|                       | -             | 23       | 83    |                  |                      |                      |                           |                           |                  |               |
| IFA 4-fold rise + Adm | +             | 28       | 1     | 96.6 (82.2-99.9) | 93.5 (87.6-97.2)     | 77.8 (60.8-          | 99.1 (95.3-               | 0.95 (0.91-0.99)          | <b>≤0.001</b>    |               |
|                       | -             | 8        | 115   |                  |                      |                      |                           |                           |                  |               |

|            |                       |    |     |     |                  |                  |                 |              |                  |               |
|------------|-----------------------|----|-----|-----|------------------|------------------|-----------------|--------------|------------------|---------------|
| <b>0.6</b> | STIC                  | +  | 24  | 19  | 55.8 (39.9-70.9) | 90.8 (83.8-95.5) | 73.6 (52.5-     | 83.9 (76.0-  | 0.73 (0.65-0.81) | <b>≤0.001</b> |
|            |                       | -  | 10  | 99  |                  |                  |                 |              |                  |               |
|            | IVI                   | +  | 4   | 3   | 57.1 (18.4-90.1) | 79.3 (71.8-85.6) | 11.8 (3.3-27.5) | 97.5 (92.7-  | 0.68 (0.48-0.88) | <b>0.045</b>  |
|            |                       | -  | 30  | 115 |                  |                  |                 |              |                  |               |
|            | PCR                   | +  | 19  | 5   | 79.2 (57.8-92.9) | 88.3 (81.4-93.3) | 55.9 (37.9-     | 95.8 (90.4-  | 0.84 (0.75-0.93) | <b>≤0.001</b> |
|            | -                     | 15 | 113 |     |                  |                  |                 |              |                  |               |
|            | IFA 4-fold rise       | +  | 6   | 16  | 27.3 (10.7-50.2) | 79.6 (70.8-86.8) | 21.4 (8.3-41.0) | 84.3 (75.8-  | 0.55 (0.43-0.64) | 0.473         |
|            |                       | -  | 22  | 86  |                  |                  |                 |              |                  |               |
|            | IFA 4-fold rise + Adm | +  | 27  | 2   | 93.1 (77.2-99.2) | 94.3 (88.6-97.7) | 79.4 (62.1-     | 98.3 (94.0-  | 0.94 (0.89-0.99) | <b>≤0.001</b> |
|            |                       | -  | 7   | 116 |                  |                  |                 |              |                  |               |
| <b>0.7</b> | STIC                  | +  | 23  | 20  | 53.5 (37.7-68.8) | 91.7 (84.9-96.2) | 71.9 (53.3-     | 82.3 (75.4-  | 0.73 (0.65-0.81) | <b>≤0.001</b> |
|            |                       | -  | 9   | 100 |                  |                  |                 |              |                  |               |
|            | IVI                   | +  | 4   | 3   | 57.1 (18.4-90.1) | 80.7 (73-86.8)   | 12.5 (3.5-29.0) | 97.5 (92.9 - | 0.69 (0.49-0.89) | <b>0.036</b>  |
|            |                       | -  | 28  | 117 |                  |                  |                 |              |                  |               |
|            | PCR                   | +  | 19  | 5   | 79.2 (57.8-92.9) | 89.8 (83.3-94.5) | 59.4 (40.6-     | 95.8 (90.5-  | 0.86 (0.76-0.93) | <b>≤0.001</b> |
|            | -                     | 13 | 115 |     |                  |                  |                 |              |                  |               |
|            | IFA 4-fold rise       | +  | 5   | 17  | 22.7 (7.8-45.4)  | 80.6 (71.8-87.5) | 19.2 (6.6-39.4) | 83.7 (75.1-  | 0.52 (0.42-0.61) | 0.726         |
|            |                       | -  | 21  | 87  |                  |                  |                 |              |                  |               |
|            | IFA 4-fold rise + Adm | +  | 26  | 3   | 89.7 (72.6-97.8) | 95.1 (89.7-98.2) | 81.3 (63.6-     | 97.5 (92.9-  | 0.93 (0.86-0.98) | <b>≤0.001</b> |
|            |                       | -  | 6   | 117 |                  |                  |                 |              |                  |               |
| <b>0.8</b> | STIC                  | +  | 22  | 21  | 51.2 (35.5-66.7) | 94.5 (88.4-98.0) | 78.6 (59.0-     | 83.1 (75.3-  | 0.73 (0.65-0.81) | <b>≤0.001</b> |
|            |                       | -  | 6   | 103 |                  |                  |                 |              |                  |               |
|            | IVI                   | +  | 4   | 3   | 57.1 (18.4-90.1) | 83.4 (76.4-89.1) | 14.3 (4.0-32.7) | 97.6 (93.1-  | 0.70 (0.50-0.90) | <b>0.022</b>  |
|            |                       | -  | 24  | 121 |                  |                  |                 |              |                  |               |
|            | PCR                   | +  | 18  | 6   | 75.0 (53.3-90.2) | 92.2 (80.1-96.2) | 64.3 (44.1-     | 95.2 (89.8-  | 0.84 (0.74-0.93) | <b>≤0.001</b> |
|            | -                     | 10 | 118 |     |                  |                  |                 |              |                  |               |
|            | IFA 4-fold rise       | +  | 4   | 18  | 18.2 (5.2-40.3)  | 83.3 (74.9-89.8) | 18.2 (5.2-40.3) | 83.3 (74.9-  | 0.51 (0.42-0.60) | 0.863         |
|            |                       | -  | 18  | 90  |                  |                  |                 |              |                  |               |
|            | IFA 4-fold rise + Adm | +  | 26  | 3   | 89.7 (72.6-97.8) | 98.4 (94.2-99.8) | 92.9 (76.5-     | 97/6 (93.1-  | 0.94 (0.88-1.0)  | <b>≤0.001</b> |
|            |                       | -  | 2   | 121 |                  |                  |                 |              |                  |               |
| <b>0.9</b> | STIC                  | +  | 22  | 21  | 51.2 (35.5-66.7) | 96.4 (89.6-98.5) | 81.5 (61.9-     | 83.2 (75.5-  | 0.73 (0.66-0.81) | <b>≤0.001</b> |
|            |                       | -  | 3   | 104 |                  |                  |                 |              |                  |               |
|            | IVI                   | +  | 4   | 3   | 57.1 (10.4-90.1) | 84.1 (77.2-89.7) | 14.8 (4.2-33.7) | 97.6 (93.1-  | 0.71 (0.51-0.91) | <b>0.019</b>  |
|            |                       | -  | 23  | 122 |                  |                  |                 |              |                  |               |
|            | PCR                   | +  | 18  | 6   | 75.0 (53.3-90.2) | 93.0 (87.1-96.7) | 66.7 (46.0-     | 95.2 (89.8-  | 0.84 (0.75-0.93) | <b>≤0.001</b> |
|            | -                     | 9  | 119 |     |                  |                  |                 |              |                  |               |
|            | IFA 4-fold rise       | +  | 4   | 18  | 18.2 (5.2-40.3)  | 84.3 (76.0-90.6) | 19.0 (5.5-41.9) | 83.5 (75.2-  | 0.51 (0.42-0.60) | 0.777         |
|            |                       | -  | 17  | 91  |                  |                  |                 |              |                  |               |
|            | IFA 4-fold rise + Adm | +  | 25  | 4   | 86.2 (68.3-96.1) | 98.4 (94.2-99.8) | 92.6 (75.7-     | 96.8 (92.0-  | 0.92 (0.86-0.99) | <b>≤0.001</b> |
|            |                       | -  | 2   | 121 |                  |                  |                 |              |                  |               |
| <b>1.0</b> | STIC                  | +  | 21  | 22  | 48.8 (33.3-64.5) | 96.3 (90.9-99.0) | 84.0 (63.9-     | 82.7 (75.0-  | 0.73 (0.65-0.80) | <b>≤0.001</b> |
|            |                       | -  | 4   | 105 |                  |                  |                 |              |                  |               |
|            | IVI                   | +  | 4   | 3   | 57.1 (10.4-90.1) | 85.5 (78.7-90.8) | 16.0 (4.5-36.1) | 97.6 (93.1-  | 0.71 (0.51-0.91) | <b>0.014</b>  |
|            |                       | -  | 21  | 124 |                  |                  |                 |              |                  |               |
|            | PCR                   | +  | 17  | 7   | 70.8 (48.9-87.4) | 93.8 (88.1-97.3) | 68.0 (46.5-     | 94.5 (89.0-  | 0.82 (0.73-0.92) | <b>≤0.001</b> |
|            | -                     | 8  | 120 |     |                  |                  |                 |              |                  |               |
|            | IFA 4-fold rise       | +  | 3   | 19  | 13.6 (2.9-34.9)  | 85.2 (77.1-91.3) | 15.8 (3.4-39.6) | 82.9 (74.6-  | 0.49 (0.41-0.57) | 0.887         |
|            |                       | -  | 16  | 92  |                  |                  |                 |              |                  |               |
|            | IFA 4-fold rise + Adm | +  | 24  | 5   | 82.8 (64.2-94.2) | 99.2 (95.6 -100) | 96.0 (79.6-     | 96..1 (91.1- | 0.91 (0.84-0.98) | <b>≤0.001</b> |
|            |                       | -  | 1   | 122 |                  |                  |                 |              |                  |               |

|            |                       |   |    |     |                   |                  |                 |              |                  |               |
|------------|-----------------------|---|----|-----|-------------------|------------------|-----------------|--------------|------------------|---------------|
| <b>1.5</b> | STIC                  | + | 20 | 23  | 46.4 (31.2-62.3)  | 97.2 (92.0-99.4) | 87.0 (66.4-     | 82.2 (74.5-  | 0.72 (0.64-0.80) | <b>≤0.001</b> |
|            |                       | - | 3  | 106 |                   |                  |                 |              |                  |               |
|            | IVI                   | + | 4  | 3   | 57.1 (18.4-90.1)  | 86.9 (80.3 -     | 17.4 (5.0-      | 97.7 (93.4 - | 0.72 (0.52-      | <b>0.007</b>  |
|            |                       | - | 16 | 126 |                   |                  |                 |              |                  |               |
|            | PCR                   | + | 16 | 8   | 66.6 (44.7- 84.4) | 94.5 (89.1-      | 69.6 (47.1-     | 93.8(88.1-   | 0.81 (0.71-      | <b>≤0.001</b> |
|            |                       | - | 7  | 121 |                   |                  |                 |              |                  |               |
|            | IFA 4-fold rise       | + | 3  | 19  | 13.6 (2.9-34.9)   | 87.0 (79.2-92.7) | 17.6 (3.8-43.4) | 83.2 (75.0-  | 0.50 (0.42-      | 0.932         |
|            |                       | - | 14 | 94  |                   |                  |                 |              |                  |               |
|            | IFA 4-fold rise + Adm | + | 23 | 6   | 79.3 (60.3-92.0)  | 100 (97.0-100)   | 100 (85.2-      | 95.3 (90.2-  | 0.90 (0.82 -     | <b>≤0.001</b> |
|            |                       | - | 0  | 123 |                   |                  |                 |              |                  |               |
| <b>2.0</b> | STIC                  | + | 20 | 23  | 46.5 (31.2-62.3)  | 100 (96.7-100)   | 100 (83.2-100)  | 81.1 (73.3-  | 0.73 (0.66-0.81) | <b>≤0.001</b> |
|            |                       | - | 0  | 109 |                   |                  |                 |              |                  |               |
|            | IVI                   | + | 4  | 3   | 57.1 (18.4-90.1)  | 89.0 (82.7-93.6) | 20 (5.7-43.7)   | 97.7 (93.5-  | 0.73 (0.53-0.93) | <b>≤0.001</b> |
|            |                       | - | 16 | 129 |                   |                  |                 |              |                  |               |
|            | PCR                   | + | 14 | 10  | 58.3 (0.36.6-     | 95.3 (90.98.3)   | 70.0(45.7-      | 92.4 (86.5-  | 0.77 (0.67-0.87) | <b>≤0.001</b> |
|            |                       | - | 6  | 122 |                   |                  |                 |              |                  |               |
|            | IFA 4-fold rise       | + | 3  | 19  | 13.6 (2.9-34.9)   | 88.0 (80.3-93.4) | 18.8 (4.1-      | 83.3 (75.2-  | 0.51 (0.43-      | 0.835         |
|            |                       | - | 13 | 95  |                   |                  |                 |              |                  |               |
|            | IFA 4-fold rise + Adm | + | 20 | 9   | 69.0 (49.2-84.7)  | 100 (97.0-100)   | 100 (93.2-      | 93.2 (87.5-  | 0.85 (0.76 -     | <b>≤0.001</b> |
|            |                       | - | 0  | 123 |                   |                  |                 |              |                  |               |
| <b>2.5</b> | STIC                  | + | 20 | 23  | 46.5 (31.2-62.3)  | 100 (96.7-100)   | 100 (83.2-100)  | 82.6 (75.0-  | 0.73 (0.66-0.81) | <b>≤0.001</b> |
|            |                       | - | 0  | 109 |                   |                  |                 |              |                  |               |
|            | IVI                   | + | 4  | 3   | 57.1 (18.4-90.1)  | 89.0 (82.7-93.6) | 20 (5.7-43.7)   | 97.7 (93.5-  | 0.73 (0.53-0.93) | <b>≤0.001</b> |
|            |                       | - | 16 | 129 |                   |                  |                 |              |                  |               |
|            | PCR                   | + | 14 | 10  | 58.3 (0.36.6-     | 95.3 (90.98.3)   | 70.0(45.7-      | 92.4 (86.5-  | 0.77 (0.67-0.87) | <b>≤0.001</b> |
|            |                       | - | 6  | 122 |                   |                  |                 |              |                  |               |
|            | IFA 4-fold rise       | + | 3  | 19  | 13.6 (2.9-34.9)   | 88.0 (80.3-93.4) | 18.8 (4.1-      | 83.3 (75.2-  | 0.51 (0.43-      | 0.835         |
|            |                       | - | 13 | 95  |                   |                  |                 |              |                  |               |
|            | IFA 4-fold rise + Adm | + | 20 | 9   | 69.0 (49.2-84.7)  | 100 (97.0-100)   | 100 (93.2-      | 93.2 (87.5-  | 0.85 (0.76 -     | <b>≤0.001</b> |
|            |                       | - | 0  | 123 |                   |                  |                 |              |                  |               |
| <b>3.0</b> | STIC                  | + | 20 | 23  | 46.5 (31.2-62.3)  | 100 (96.7-100)   | 100 (83.2-100)  | 82.6 (75.0-  | 0.73 (0.66-0.81) | <b>≤0.001</b> |
|            |                       | - | 0  | 109 |                   |                  |                 |              |                  |               |
|            | IVI                   | + | 4  | 3   | 57.1 (18.4-90.1)  | 89.0 (82.7-93.6) | 20 (5.7-43.7)   | 97.7 (93.5-  | 0.73 (0.53-0.93) | <b>≤0.001</b> |
|            |                       | - | 16 | 129 |                   |                  |                 |              |                  |               |
|            | PCR                   | + | 14 | 10  | 58.3 (0.36.6-     | 95.3 (90.98.3)   | 70.0(45.7-      | 92.4 (86.5-  | 0.77 (0.67-0.87) | <b>≤0.001</b> |
|            |                       | - | 6  | 122 |                   |                  |                 |              |                  |               |
|            | IFA 4-fold rise       | + | 3  | 19  | 13.6 (2.9-34.9)   | 88.0 (80.3-93.4) | 18.8 (4.1-      | 83.3 (75.2-  | 0.51 (0.43-      | 0.835         |
|            |                       | - | 13 | 95  |                   |                  |                 |              |                  |               |
|            | IFA 4-fold rise + Adm | + | 20 | 9   | 69.0 (49.2-84.7)  | 100 (97.0-100)   | 100 (93.2-      | 93.2 (87.5-  | 0.85 (0.76 -     | <b>≤0.001</b> |
|            |                       | - | 0  | 123 |                   |                  |                 |              |                  |               |
| <b>3.5</b> | STIC                  | + | 19 | 24  | 44.2 (29.1-60.1)  | 100 (96.7-100)   | 100 (82.4-      | 82.0 (74.4-  | 0.72 (0.65-0.80) | <b>≤0.001</b> |
|            |                       | - | 0  | 109 |                   |                  |                 |              |                  |               |
|            | IVI                   | + | 4  | 3   | 57.1 (18.4-90.1)  | 89.7 (83.5-94.1) | 21.1 (6.1-      | 97.7 (93.5-  | 0.73 (0.53-      | <b>≤0.001</b> |
|            |                       | - | 15 | 130 |                   |                  |                 |              |                  |               |
|            | PCR                   | + | 13 | 11  | 54.2 (32.8-74.4)  | 95.3 (90.1-98.3) | 68.4 (43.4-     | 91.7 (85.7-  | 0.75 (0.64-0.85) | <b>≤0.001</b> |
|            |                       | - | 6  | 122 |                   |                  |                 |              |                  |               |
|            | IFA 4-fold rise       | + | 3  | 20  | 9.1 (1.1-29.2)    | 88.0 (80.3-93.4) | 13.3 (1.7-40.5) | 82.6 (74.4-  | 0.49 (0.42-0.55) | 0.693         |
|            |                       | - | 13 | 95  |                   |                  |                 |              |                  |               |
|            | IFA 4-fold rise + Adm | + | 19 | 10  | 65.5 (45.7-82.1)  | 100 (97.0-100)   | 100 (82.4-100)  | 92.5 (86.6-  | 0.83 (0.74-0.92) | <b>≤0.001</b> |
|            |                       | - | 0  | 35  |                   |                  |                 |              |                  |               |

|            |                       |   |    |     |                  |                   |                 |              |                  |               |
|------------|-----------------------|---|----|-----|------------------|-------------------|-----------------|--------------|------------------|---------------|
| <b>4.0</b> | STIC                  | + | 17 | 26  | 39.5 (25.0-55.6) | 100 (96.7-100)    | 100 (80.5-100)  | 80.7 (73.1-  | 0.70 (0.62-0.77) | <b>≤0.001</b> |
|            |                       | - | 0  | 109 |                  |                   |                 |              |                  |               |
|            | IVI                   | + | 2  | 5   | 28.6 (3.7-71.0)  | 89.7 (83.5-94.1)  | 11.8 (1.5-36.4) | 96.3 (91.6-  | 0.59 (0.41-0.77) | 0.177         |
|            |                       | - | 15 | 130 |                  |                   |                 |              |                  |               |
|            | PCR                   | + | 11 | 13  | 45.8 (25.6-67.2) | 95.3 (90.1-98.3)  | 64.7 (38.3-     | 90.4 (84.1-  | 0.71 (0.6)-0.81) | <b>≤0.001</b> |
|            |                       | - | 6  | 122 |                  |                   |                 |              |                  |               |
|            | IFA 4-fold rise       | + | 2  | 20  | 9.1 (1.1-29.2)   | 89.8 (82.5 -94.8) | 15.4 (1.9-45.4) | 82.9 (74.8-  | 0.50 (0.43-0.56) | 0.876         |
|            |                       | - | 11 | 97  |                  |                   |                 |              |                  |               |
|            | IFA 4-fold rise + Adm | + | 17 | 12  | 58.6 (38.9–76.5) | 100 (97.0–100)    | 100 (80.5–      | 91.1 (85.0–  | 0.79 (0.70–      | <b>≤0.001</b> |
|            |                       | - | 0  | 123 |                  |                   |                 |              |                  |               |
| <b>4.5</b> | STIC                  | + | 7  | 36  | 16.3 (6.8-30.7)  | 100 (96.7-100)    | 100 (59.0-100)  | 75.2 (67.3-  | 0.58 (0.53-0.64) | <b>≤0.001</b> |
|            |                       | - | 0  | 109 |                  |                   |                 |              |                  |               |
|            | IVI                   | + | 0  | 7   | 0 (0-41.0)       | 95.2 (90.3-98.0)  | 0 (0-41.0)      | 95.2 (90.3-  | 0.48 (0.46-0.49) | 0.714         |
|            |                       | - | 7  | 138 |                  |                   |                 |              |                  |               |
|            | PCR                   | + | 3  | 21  | 12.5 (2.7-32.4)  | 96.9 (92.2-99.1)  | 42.9 (9.9 –     | 85.5 (78.7 – | 0.55 (0.48–      | 0.080         |
|            |                       | - | 4  | 123 |                  |                   |                 |              |                  |               |
|            | IFA 4-fold rise       | + | 1  | 23  | 4.6 (0.1-22.8)   | 96.3 (90.7-99.0)  | 20.0 (1.0-71.6) | 83.2 (75.5-  | 0.50 (0.46-0.55) | 0.852         |
|            |                       | - | 4  | 104 |                  |                   |                 |              |                  |               |
|            | IFA 4-fold rise + Adm | + | 7  | 22  | 24.1 (10.3-43.5) | 100 (97.0-100)    | 100 (59.0-100)  | 84.8 (77.9-  | 0.62 (0.54-0.70) | <b>≤0.001</b> |
|            |                       | - | 0  | 123 |                  |                   |                 |              |                  |               |
| <b>5.0</b> | STIC                  | + | 1  | 42  | 2.3 (0.6-12.3)   | 100 (96.7-100)    | 100 (2.5-100)   | 72.2 (64.3-  | 0.51 (0.49-0.53) | 0.110         |
|            |                       | - | 0  | 109 |                  |                   |                 |              |                  |               |
|            | IVI                   | + | 0  | 7   | 0 (0-41.0)       | 99.3 (96.2-100)   | 0 (0-97.5)      | 95.4 (90.7-  | 0.50 (0.49-0.50) | 0.954         |
|            |                       | - | 1  | 144 |                  |                   |                 |              |                  |               |
|            | PCR                   | + | 0  | 24  | 0 (0-14.2)       | 99.2 (95.7-100)   | 0 (0-97.5)      | 84.1 (77.3-  | 0.50 (0.49-0.50) | 0.842         |
|            |                       | - | 1  | 127 |                  |                   |                 |              |                  |               |
|            | IFA 4-fold rise       | + | 0  | 22  | 0 (0-15.4)       | 99.1 (94.9-100)   | 0 (0-97.5)      | 82.9 (75.3-  | 0.50 (0.49-0.50) | 0.650         |
|            |                       | - | 1  | 107 |                  |                   |                 |              |                  |               |
|            | IFA 4-fold rise + Adm | + | 1  | 28  | 3.5 (1.0-17.8)   | 100 (97-100)      | 100 (2.5-100)   | 81.5 (74.3-  | 0.52 (0.48-0.55) | 0.131         |
|            |                       | - | 0  | 123 |                  |                   |                 |              |                  |               |

Data analysed using 2x2 cross-tabulation and ROC curves, for each STIC combined or individual components and data stratified by ELISA cut-off OD ranging from 0.1 to 5.0. *Abbreviations:* a= positive predictive value / b= negative predictive value/ c= Area under receiver operator characteristic curve.
